# Supplementary material for: Transcapillary transport of water, small solutes and proteins during hemodialysis
Source: PubMed Central journal article supplement (PMC7603324; doi:10.1038/s41598-020-75687-1), 2020-10-30
Supplement: 41598_2020_75687_MOESM1_ESM.pdf [file 41598_2020_75687_MOESM1_ESM.pdf]

## **SUPPLEMENTARY MATERIAL**

### **THREE-PORE MODEL OF THE CAPILLARY WALL**

Fluid filtration from the capillary compartment to the interstitial compartment depends on the imbalance between the Starling forces acting across the capillary walls [1]: the hydraulic capillary blood pressure, the hydrostatic interstitial pressure and the osmotic (mainly oncotic) pressures exerted by all solutes on both sides of the capillary wall [2,3]. In the three-pore model (3PM) the transcapillary filtration needs to be defined separately for each type of pore ( $J_i$ ) as follows:

$$J_i = \alpha_i LpS \left[ (P_{sc} - P_{is}) - \sum_p \sigma_{p,i} (\pi_{p,pl,sc} - \pi_{p,is}) - \sum_s \sigma_{s,i} \varphi_s \left( \alpha_s \frac{c_{s,pl,sc}}{F_{pl,sc}} - \frac{c_{s,is}}{F_{is}} \right) \right] RT \quad (1)$$

where  $LpS$  is the whole-body hydraulic conductivity of capillary walls (assumed constant),  $\alpha_i$  is the fraction of  $LpS$  contributed by the  $i$ -th type of pore ( $\alpha_{LP} + \alpha_{SP} + \alpha_{UP} = 1$ ),  $P_{sc}$  is the mean hydraulic pressure of systemic capillary blood,  $P_{is}$  is the hydrostatic pressure of the interstitial fluid,  $\sigma_{p,i}$  and  $\sigma_{s,i}$  are the Staverman’s reflection coefficients of protein  $p$  and solute  $s$  at the  $i$ -th pore,  $\pi_{p,pl,sc}$  and  $\pi_{p,is}$  are the oncotic pressures (colloid osmotic pressures) of protein  $p$  (albumin or globulins) in the capillary plasma and interstitial fluid,  $\varphi_s$  is the osmotic activity coefficient of solute  $s$ ,  $\alpha_s$  is the Gibbs-Donnan coefficient for ion  $s$  with charge  $z_s$  (for simplicity  $\alpha_s = \alpha^{z_s}$  [8], where  $\alpha$  is determined from the steady-state conditions), and  $RT$  is a constant ( $= 19.3$  mmHg/mmol/L).

The total transcapillary fluid filtration is then expressed as:

$$J = J_{LP} + J_{SP} + J_{UP} \quad (2)$$

It was assumed that the mean hydraulic pressure of capillary plasma ( $P_{sc}$ ) is resistant to isolated changes in arterial pressure (the auto-regulatory capacity of the capillary bed), whereas 80% of changes in venous pressure are transmitted to the capillaries [4].  $P_{sc}$  is hence calculated as:

$$P_{sc} = P_{sc,0} + w_v \cdot (P_{sv} - P_{sv,0}) \quad (3)$$

where  $P_{sc,0}$  is the initial mean capillary pressure calculated from the initial steady-state conditions,  $w_v$  is a parameter (assumed value of 0.8, based on experimental data [4]) and  $P_{sv,0}$  is the assumed initial (normal) pressure in the small veins compartment (12 mm Hg [4]).

The hydrostatic pressure of the interstitial fluid was described as a linear function of the interstitial volume [2,5]:

$$P_{is} = P_{is,n} + \frac{1}{C_{is}} \cdot (V_{is} - V_{is,n}) \quad (4)$$

where  $P_{is,n}$  is the normal interstitial pressure corresponding to the normal interstitial volume ( $V_{is,n}$ ) and  $C_{is}$  is the interstitial compliance, which was assumed to be 12% of normal interstitial volume per mm Hg [6].

The plasma oncotic pressure (in mm Hg) exerted by albumin ( $\pi_{\text{alb,pl,sc}}$ ) and globulins ( $\pi_{\text{glob,pl,sc}}$ ) are calculated using the following equations [4] (based on Landis-Pappenheimer equations [7]).

$$\pi_{\text{alb,pl,sc}} = a_{\text{sc}} \left( 2.8c_{\text{p,sc}} + 0.18c_{\text{p,sc}}^2 + 0.012c_{\text{p,sc}}^3 \right) \quad (5)$$

$$\pi_{\text{glob,pl,sc}} = b_{\text{sc}} \left( 1.1c_{\text{p,sc}} + 0.13c_{\text{p,sc}}^2 + 0.005c_{\text{p,sc}}^3 \right) \quad (6)$$

where  $c_{\text{p,sc}}$  is the total protein concentration in capillary plasma in g/dL, whereas  $a_{\text{sc}}$  and  $b_{\text{sc}}$  are variable albumin and globulins mass fractions of total plasma proteins ( $a_{\text{sc}} + b_{\text{sc}} = 1$ ).

Similar equations were used for calculating the oncotic pressure of interstitial albumin and globulins based on the total concentration of proteins in the interstitial compartment ( $c_{\text{p,is}}$ ) and the corresponding  $a_{\text{is}}$  and  $b_{\text{is}}$  fractions (also variable).

The transcapillary transport of small solutes (except other anions) through the  $i$ -th type of pore can be described as a sum of diffusive and convective flows using the following equation [4]:

$$Q_{s,i} = \text{PS}_{s,i} \left( \alpha_s \frac{c_{s,\text{pl,sc}}}{F_{\text{pl,sc}}} - \frac{c_{s,\text{is}}}{F_{\text{is}}} \right) + J_{w,i} S_{s,i} \left[ (1-f_{s,i}) \alpha_s \frac{c_{s,\text{pl,sc}}}{F_{\text{pl,sc}}} + f_{s,i} \frac{c_{s,\text{is}}}{F_{\text{is}}} \right] \quad (7)$$

where  $\text{PS}_{s,i}$  is the permeability-surface product for solute  $s$  at the  $i$ -th type of pore (assumed constant),  $\alpha_s$  is the Gibbs-Donnan coefficient for ion  $s$ ,  $c_{s,\text{pl,sc}}$  and  $c_{s,\text{is}}$  are the concentrations of solute  $s$  in the capillary plasma and interstitial fluid,  $F_{\text{pl,sc}}$  and  $F_{\text{is}}$  are variable water fractions of the capillary plasma and interstitial fluid,  $J_{w,i}$  is the water flow through  $i$ -th pore from capillaries to interstitium (calculated as the difference between fluid filtration and the volumetric flow of convective protein leakage),  $S_{s,i}$  is the sieving coefficient for solute  $s$  at the  $i$ -th type of pore and  $f_{s,i}$  is defined as follows [8]:

$$f_{s,i} = \frac{1}{\text{Pe}_{s,i}} - \frac{1}{\exp(\text{Pe}_{s,i}) - 1} \quad (8)$$

where  $\text{Pe}_{s,i}$  is the modified Peclet number describing the relationship between the convective and diffusive transport of solute  $s$  through  $i$ -th type of pore [8] (if diffusion and convection are of opposite directions, the below equation takes the negative sign):

$$\text{Pe}_{s,i} = \frac{J_{w,i} S_{s,i}}{\text{PS}_{s,i}} \quad (9)$$

The sieving coefficient for each solute at the  $i$ -th type of pore is calculated as  $S_{s,i} = 1 - \sigma_{s,i}$ , where [9]:

$$\sigma_{s,i} = \begin{cases} 1 - \frac{(1-\lambda_{s,i})^2 \cdot [2 - (1-\lambda_{s,i})^2] \cdot (1-\frac{\lambda_{s,i}}{3})}{1 - \frac{\lambda_{s,i}}{3} + \frac{2}{3}\lambda_{s,i}^2} & \text{for } \lambda_{s,i} < 1 \\ 0 & \text{for } \lambda_{s,i} \geq 1 \end{cases} \quad (10)$$

where  $\lambda_{s,i}$  is the ratio of solute and pore radii ( $\lambda_{s,i} = r_s/r_i$ ).

Analogically, the transport of protein p through each type of pore is using the diffusive-convective equation [8,10]:

$$Q_{p,i} = PS_{p,i} (c_{p,pl,sc} - c_{p,is}) + J_i S_{p,i} [(1 - f_{p,i}) c_{p,pl,sc} + f_{p,i} c_{p,is}] \quad (11)$$

where p denotes albumin or globulins,  $PS_{p,i}$  is the permeability-surface product of the lumped capillary wall for protein p (assumed constant),  $J_i$  is the rate of fluid filtration from the capillaries to the interstitium through i-th type of pore,  $S_{p,i}$  is the capillary sieving coefficient of protein p, and  $f_p$  is defined as in the equation (8).

The transport of other anions ( $A^{2-}$ ) is calculated to obtain a zero net flow of charge across the capillary wall.

The volumetric flow of proteins from capillary plasma to interstitium through i-th type of pore is calculated as:

$$Q_{p,i,v} = Q_{p,i} \cdot \frac{MW_p}{\rho_p} \quad (12)$$

where  $MW_p$  is the molecular weight of protein p (assumed 69,000 g/mol for albumin and 170,000 g/mol for globulins [11,12]) and  $\rho_p$  is the protein density (assumed 1.37 g/cm<sup>3</sup> for both albumin and globulins [13]).

The permeability-surface product for solute s and the i-th type of pore is calculated from the following equation [9]:

$$PS_{s,i} = D_s \left( \frac{A_{0,i}}{\Delta x_i} \right) \left( \frac{A_i}{A_{0,i}} \right) \quad (13)$$

where  $D_s$  is the free diffusion coefficient of solute s calculated as [9]:

$$D_s = \frac{RT}{6\pi \cdot N_A \cdot r_s \cdot \eta_{H_2O}} \quad (14)$$

where  $N_A$  is the Avogadro number,  $r_s$  is the solute radius and  $\eta_{H_2O}$  is water dynamic viscosity at 37 °C (=0.0007 Pa·s),

$A_{0,i}$  is the total cross-sectional area of pores of type i,  $A_i$  is the effective pore area available for restricted diffusion,  $\left( \frac{A_{0,i}}{\Delta x_i} \right)$  is the total unrestricted pore area over unit diffusion length calculated as [9]:

$$\left( \frac{A_{0,i}}{\Delta x_i} \right) = \frac{8 \cdot \eta_{H_2O} \cdot Lp \cdot \alpha_i}{r_i^2} \quad (15)$$

and  $\left( \frac{A_i}{A_{0,i}} \right)_s$  - the fraction of total pore area available for restricted diffusion - is calculated as [9]:

$$\left( \frac{A_i}{A_{0,i}} \right)_s = \frac{(1 - \lambda_{s,i})^2}{1 - 0.3956 \cdot \lambda_{s,i} + 1.0616 \cdot \lambda_{s,i}^2} \quad (16)$$

## REFERENCES

1. Guyton, A. C. & Hall, J. E., *Textbook of medical physiology*, 11th ed. (Elsevier Saunders, Philadelphia, PA, 2006).
2. Gyenge, C. C., Bowen, B. D., Reed, R. K. & Bert, J. L., Transport of fluid and solutes in the body I. Formulation of a mathematical model. *Am J Physiol Heart Circ Physiol* **277** (3 Pt 2), H1215-27 (1999).
3. Wolf, M. B., Whole body acid-base and fluid-electrolyte balance: a mathematical model. *Am J Physiol Renal Physiol* **305** (8), F1118-31 (2013).
4. Pstras, L. & Waniewski, J., *Mathematical modelling of haemodialysis: Cardiovascular response, body fluid shifts, and solute kinetics* (Springer Nature Switzerland AG, Cham, Switzerland, 2019).
5. Ursino, M. & Innocenti, M., Modeling arterial hypotension during hemodialysis. *Art Org* **21** (8), 873-890 (1997).
6. Aukland, K. & Reed, R. K., Interstitial-lymphatic mechanisms in the control of extracellular fluid volume. *Physiol Rev* **73** (1), 1-78 (1993).
7. Landis, E. M. & Pappenheimer, J. R., in *Handbook of physiology. Section 2: Circulation*, edited by Hamilton, W. F. & Dow, P. (American Physiological Society, Washington, DC, 1963), Vol. 11.
8. Waniewski, J., Mathematical modeling of fluid and solute transport in hemodialysis and peritoneal dialysis. *J Membrane Sci* **274**, 24-37 (2006).
9. Rippe, B. & Haraldsson, B., Transport of macromolecules across microvascular walls: the two-pore theory. *Physiol Rev* **74** (1), 163–219 (1994).
10. Waniewski, J., in *Theoretical foundations for modelling of membrane transport in medicine and biomedical engineering* (Institute of Computer Science, Polish Academy of Sciences, Warsaw, 2015), pp. 24-7.
11. Feher, J., *Quantitative Human Physiology. An Introduction*. (Academic Press, Elsevier, Amsterdam, 2012).
12. Scatchard, G., Batchelder, A. C. & Brown, A., Chemical, clinical and immunological studies on the products of human plasma fractionation. VI. The osmotic pressure of plasma and of serum albumin. *J Clin Invest* **23** (4), 458-464 (1944).
13. Fischer, H., Polikarpov, I. & Craievich, A. F., Average protein density is a molecular-weight-dependent function. *Protein Sci* **13** (10), 2825–2828 (2004).
14. Rippe, B., Venturoli, D., Simonsen, O. & de Arteaga, J., Fluid and electrolyte transport across the peritoneal membrane during CAPD according to the three-pore model. *Perit Dial Int* **24** (1), 10-27 (2004).
